## CORRECTION

# Correction: MicroRNA-19b restricts Wnt7b to the hem, which induces aspects of hippocampus development in the avian forebrain

Suvimal Kumar Sindhu, Niveda Udaykumar, Mohd Ali Abbas Zaidi, Abhinav Soni and Jonaki Sen

There were errors in *Development* (2019) **146**, dev175729 (doi:10.1242/dev.175729).

In the Materials and Methods section, the service providers for *in vitro* Cas9 assay and Illumina Sequencing systems were not mentioned.

### Corrected:

To verify that miR-19b guide RNA expressed using pX330-19b-gRNA construct can knock out the miR-19b genomic locus, an *in vitro* Cas9 assay was performed [Centre for Cellular and Molecular Platforms (C-CAMP), Bangalore, India].

### Original:

To verify that miR-19b guide RNA expressed using pX330-19b-gRNA construct can knock out the miR-19b genomic locus, an *in vitro* Cas9 assay was performed.

### Corrected:

The mixed pool of 508 bp DNA fragments obtained was analysed by Illumina Sequencing systems (Clevergene Biocorp).

### Original:

The mixed pool of 508 bp DNA fragments obtained was analysed by Illumina Sequencing systems.

Both the online full-text and PDF versions have been updated.

The authors apologise to readers for these errors and any inconvenience they may have caused.
